# Supplementary material for: Multi-omics pan-cancer analyses identify MCM4 as a promising prognostic and diagnostic biomarker
Source: Springer Nature journal article supplement (doi:10.1038/s41598-024-57299-1), 2024-03-18
Supplement: MOESM1 [file 41598_2024_57299_MOESM1_ESM.pdf]

# Supplementary Material

## Supplementary Figures

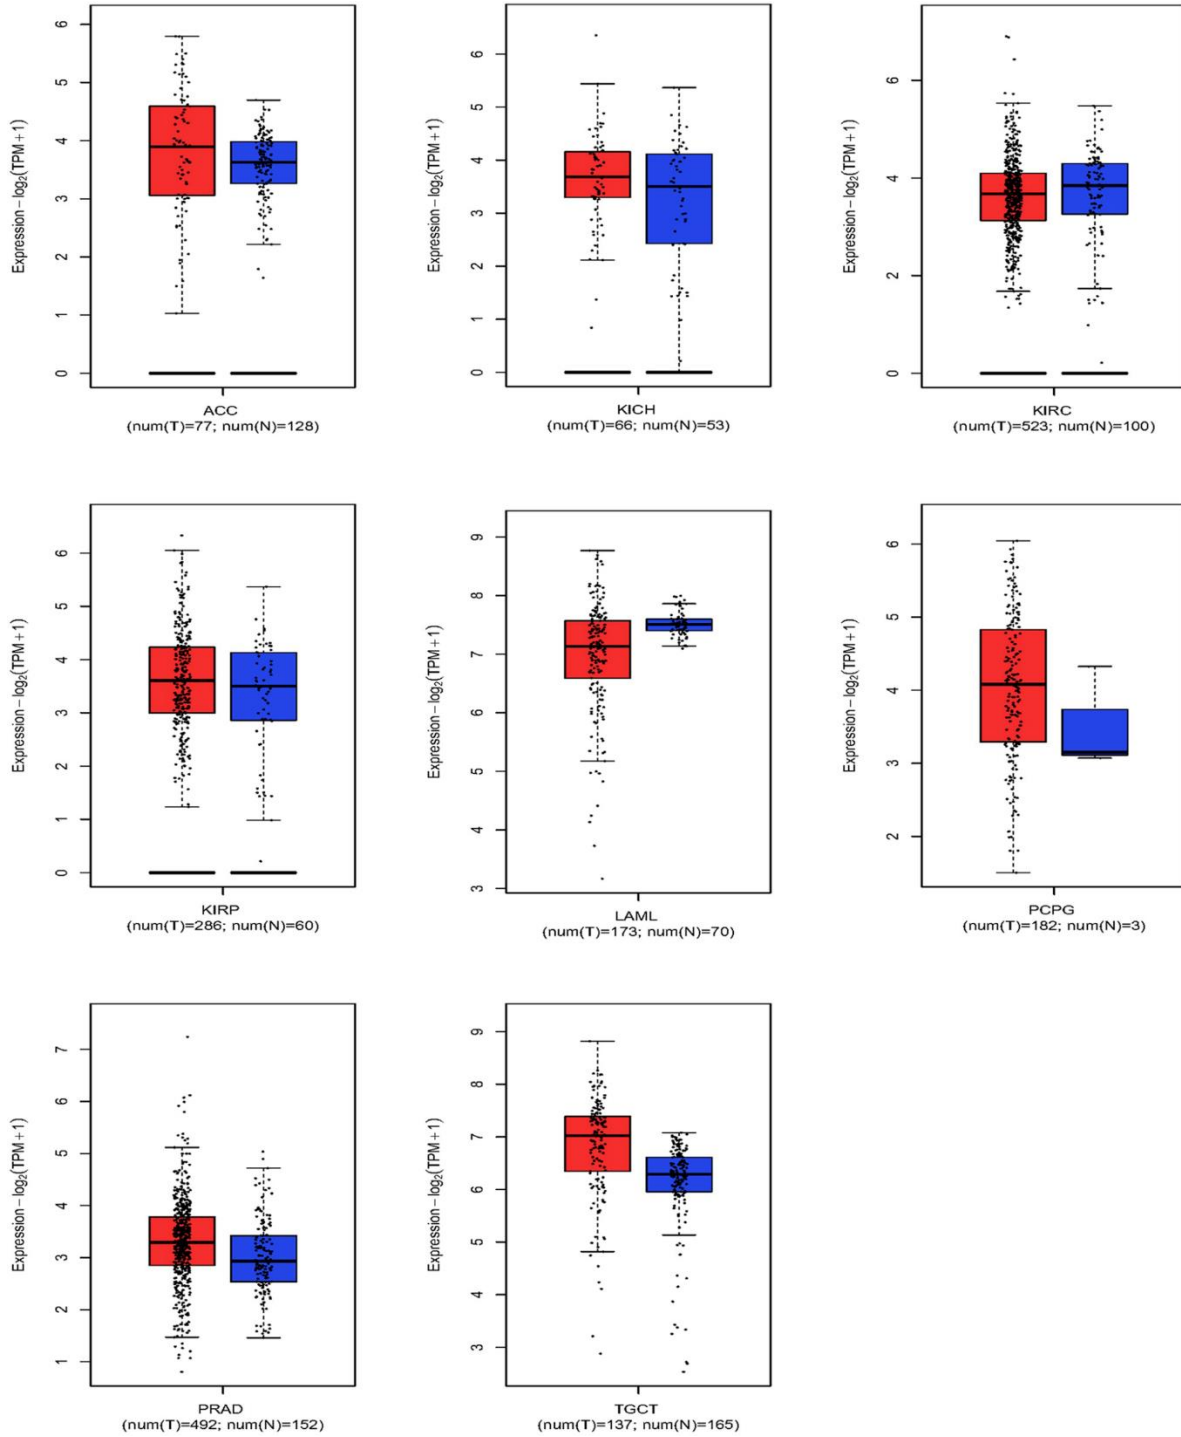

**Figure S1.** The expression levels of the MCM4 in ACC, KICH, KIRC, KIRP, LAML, PCPG, PRAD and TGCT. Data derived from TCGA and GTEx databases.

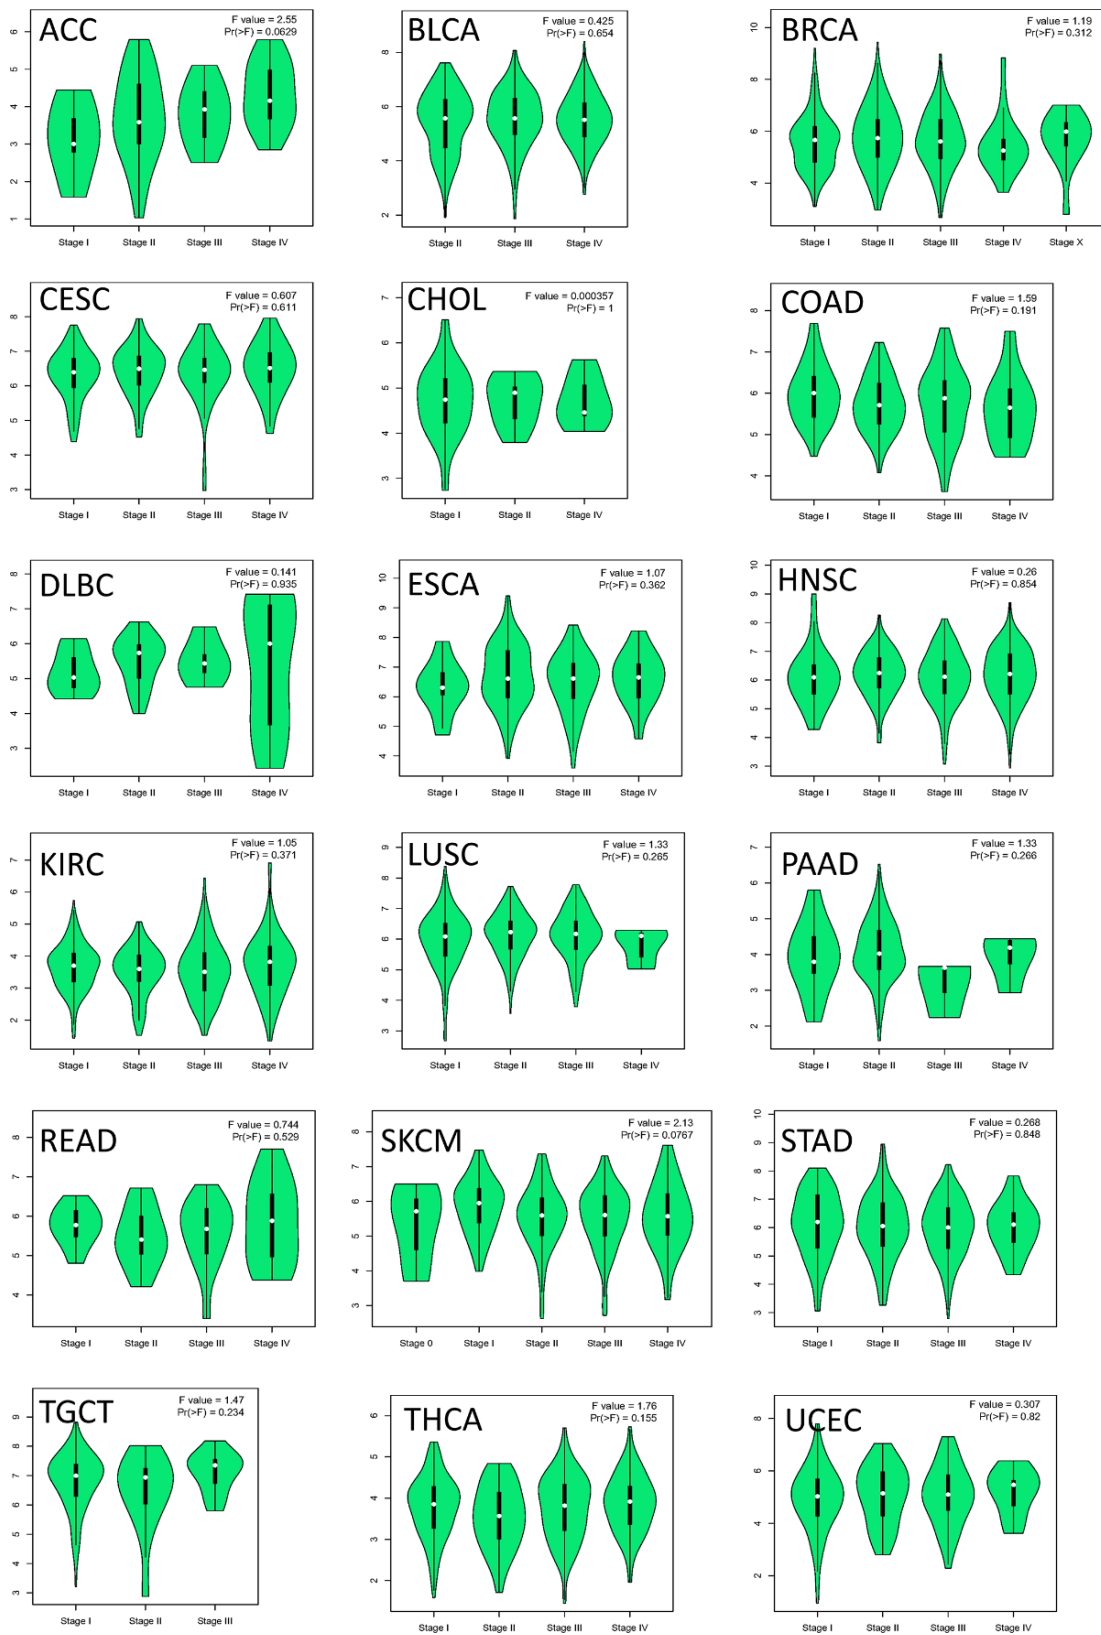

**Figure S2.** Expression levels of the MCM4 in different pathological stages of ACC, BLCA, BRCA, CESC, CHOL, COAD, DLBC, ESCA, HNSC, KIRC, LUSC, PAAD, READ, SKCM, STAD, TGCT, THCA and UCEC.

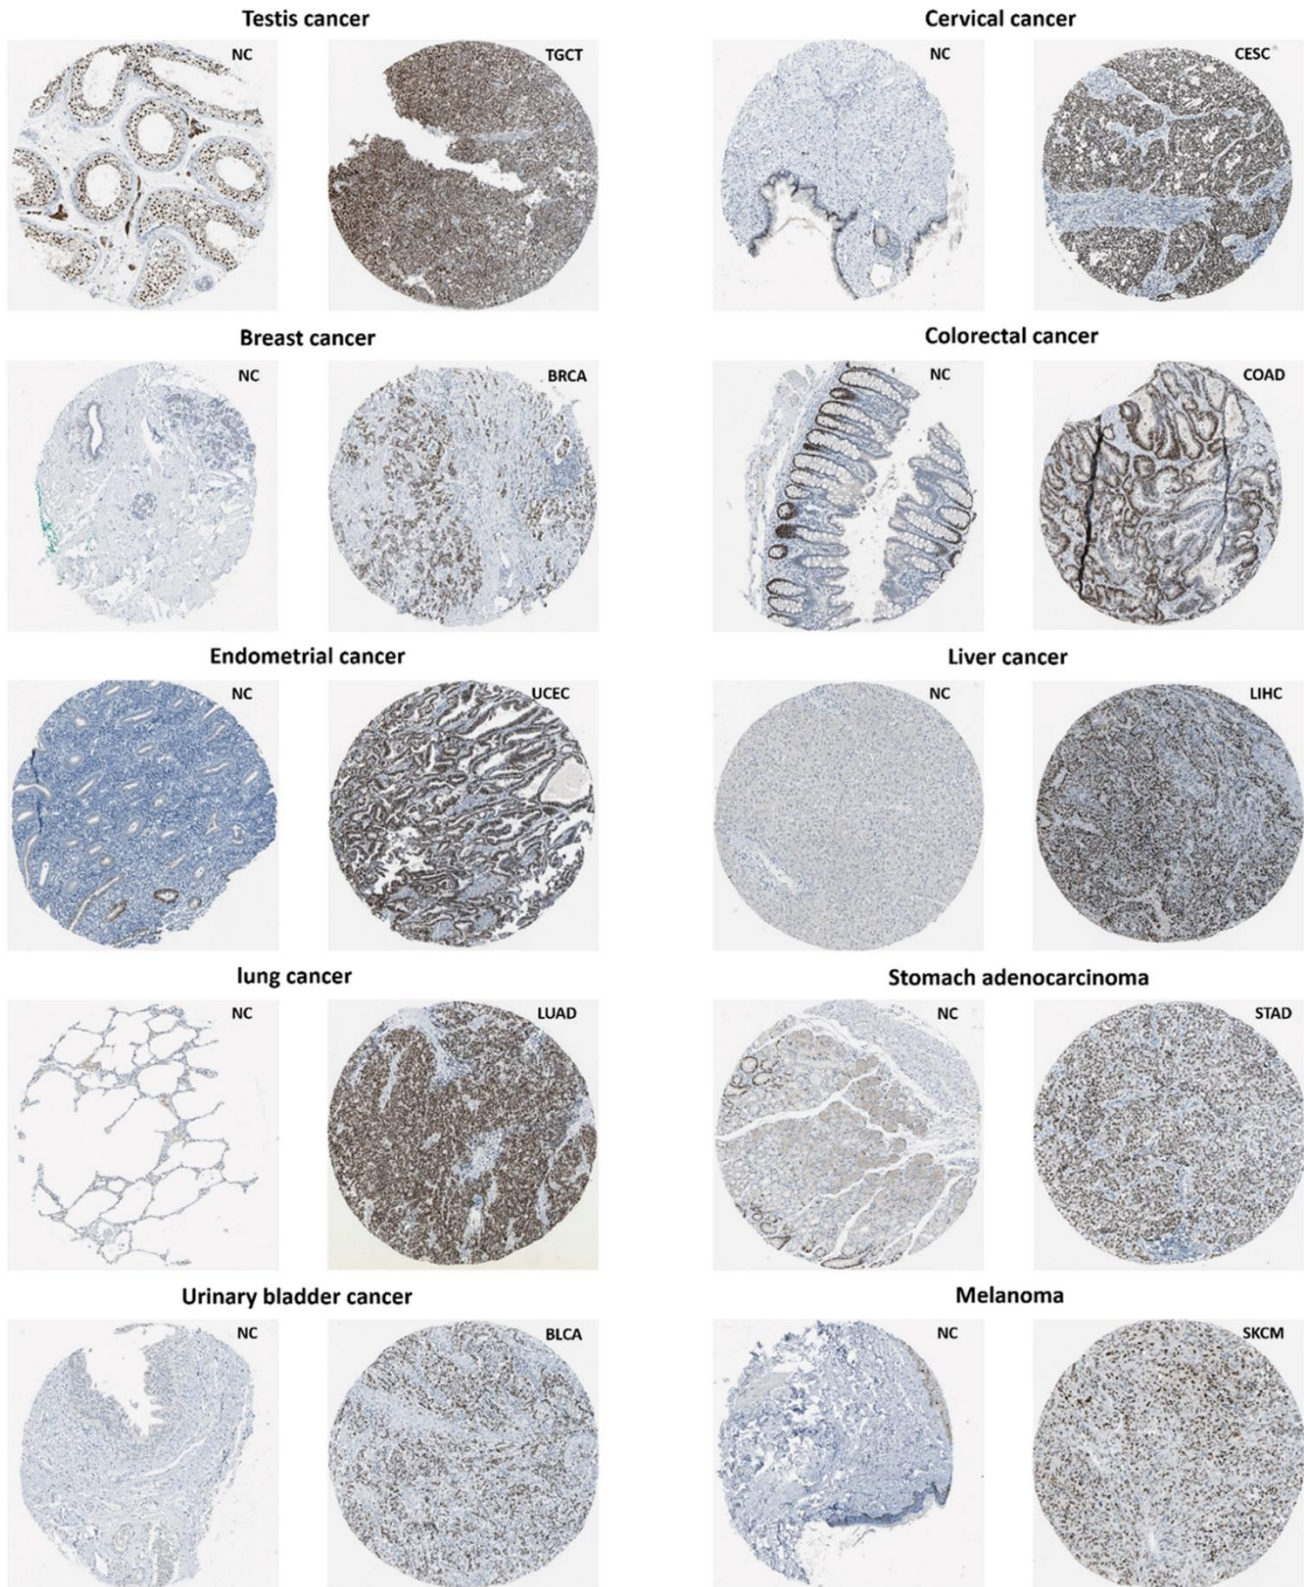

**Figure S3.** Representative immunohistochemistry images were used to contrast the expression of MCM4 between normal tissue and tumor tissue in TGCT, CESC, BRCA, COAD, UCEC, LIHC, LUAD, STAD, BLCA, and SKCM.

**A** CRISPR (DepMap Public 23Q4+Score, Chronos)

**B** RNAi (Achilles+DRIVE+Marcotte, DEMETER2)

-2 -1.5 -1 -0.5 0  
Gene Effect (Chronos)

-2 -1 0 1  
Gene Effect (DEMETER2)

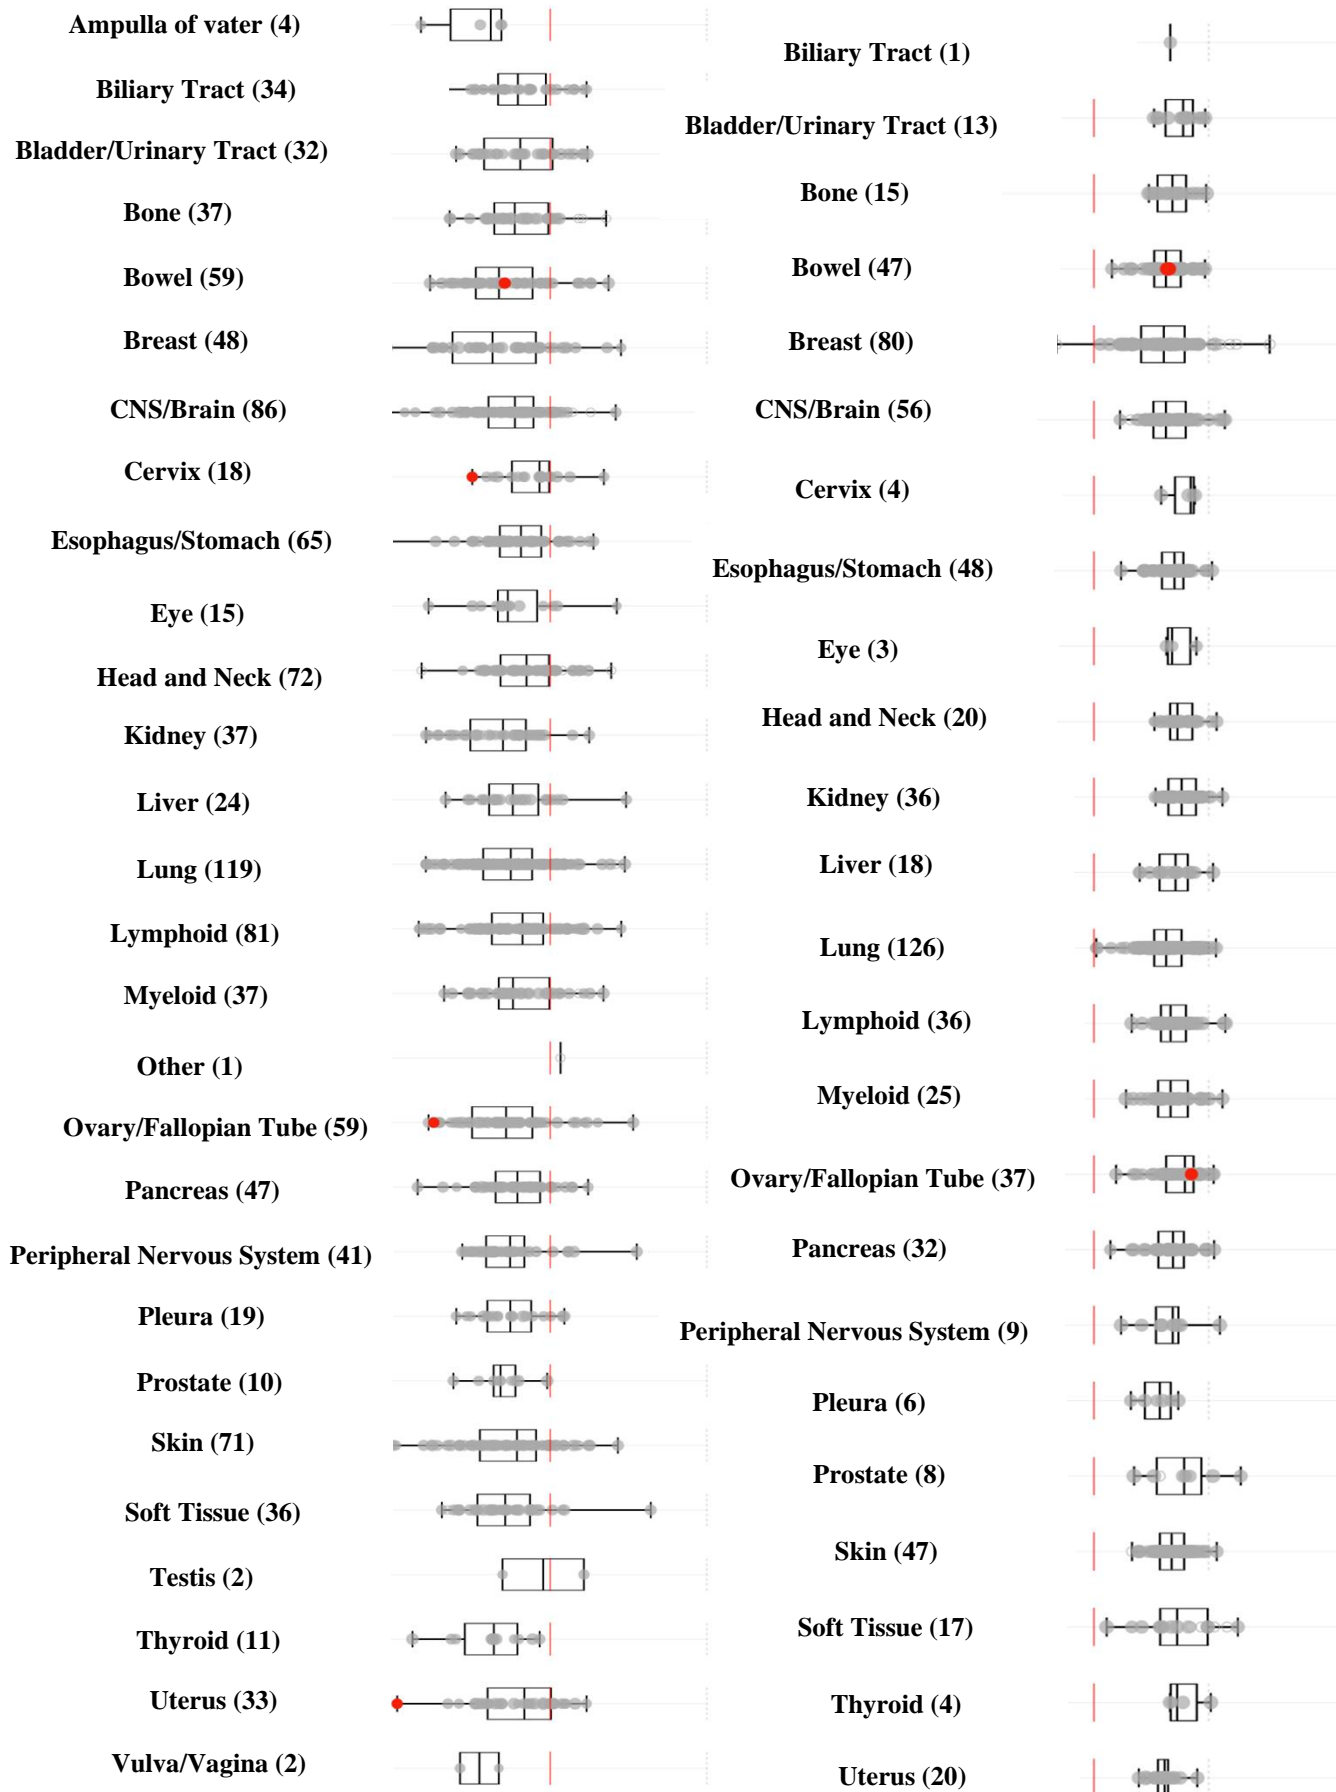

**Figure S4.** Essentiality of MCM4 in cancer cell lines. **(A)** MCM4's essentiality in cancer cell lines across various cancer types, verified by CRISPR knockdown. **(B)** MCM4's essentiality in cancer cell lines across various cancer types, verified by RNAi interference. The number in parentheses in each row corresponds to the number of tumor cell line types belonging to that tissue or organ recorded in the database. Each solid gray dot corresponds to a cancer cell line.

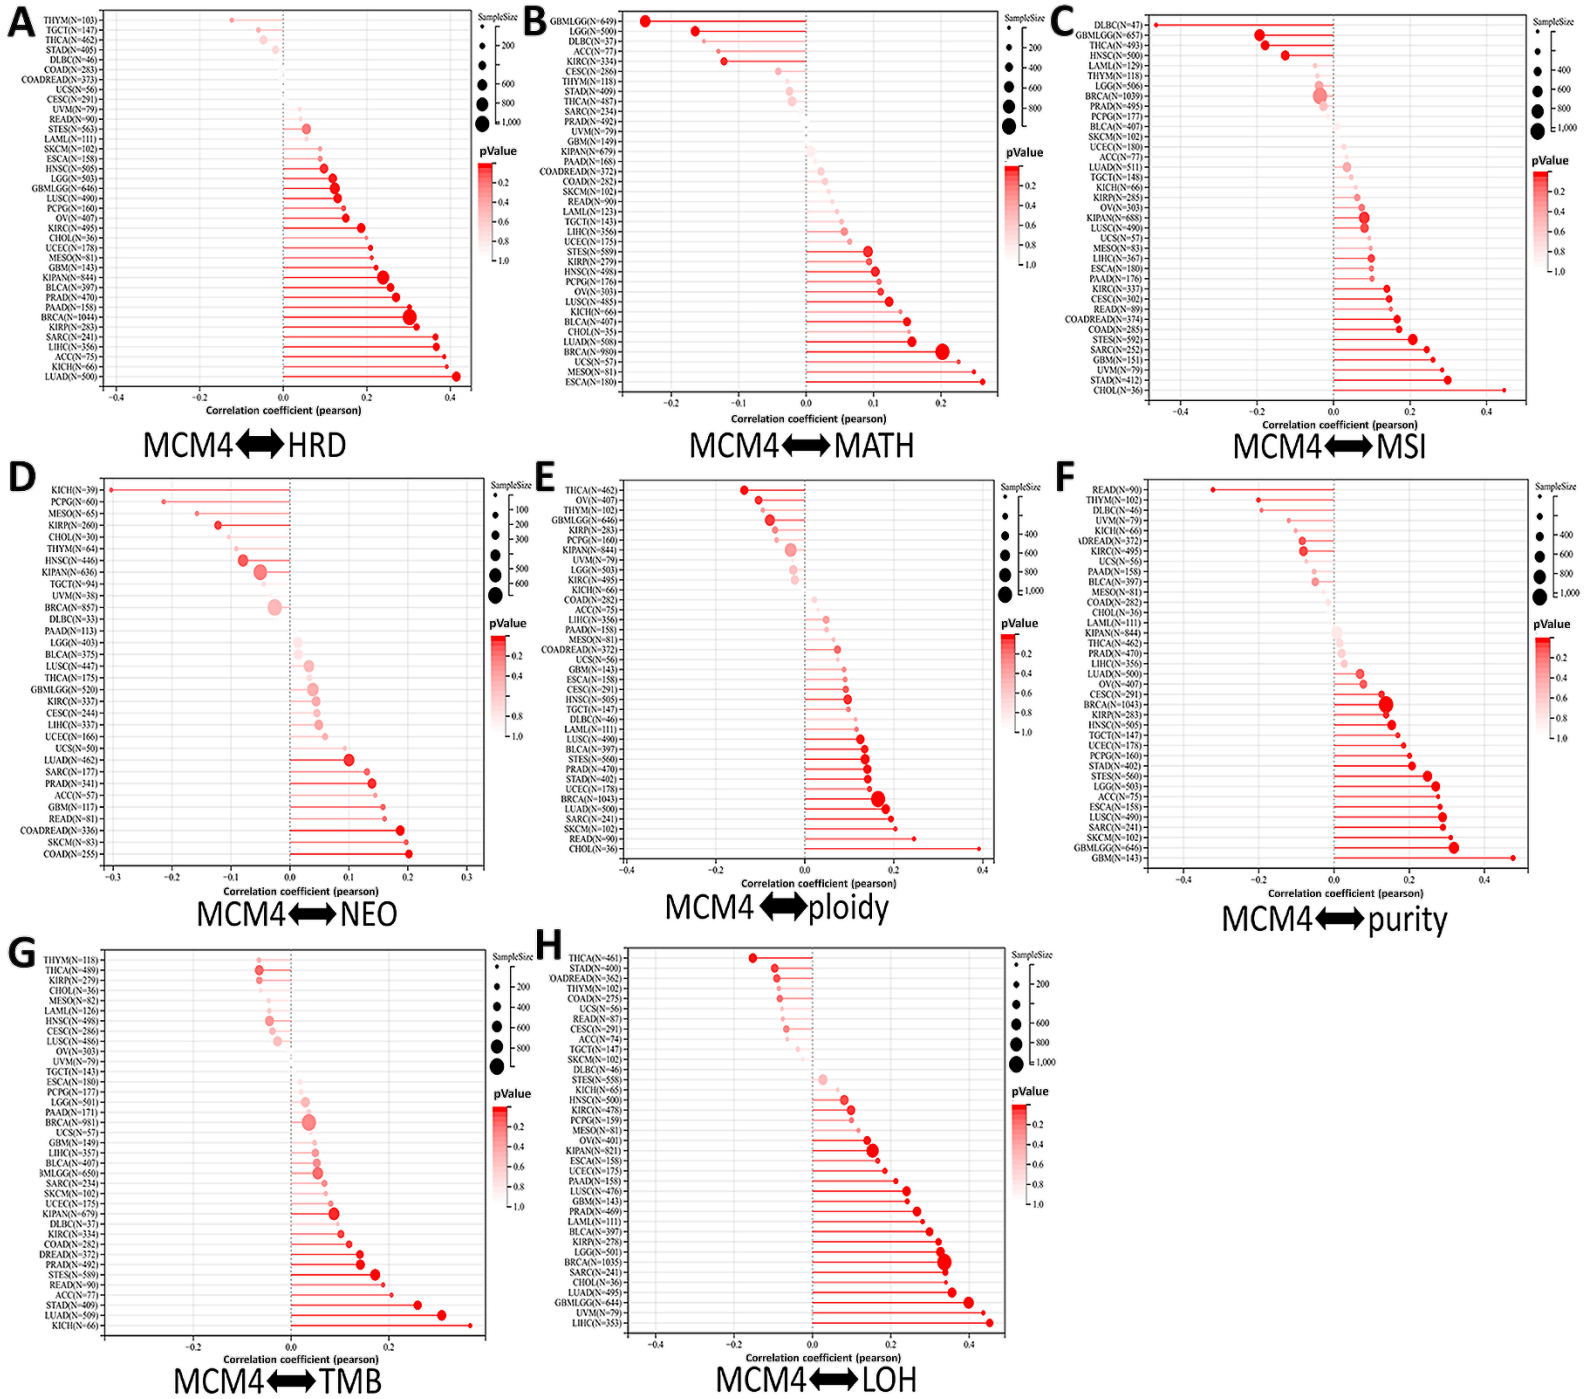

**Figure S5.** Correlation between MCM4 gene expression level and genetic characteristic indicators associated with tumors, including (A) HRD, (B) MATH, (C) MSI, (D) NEO, (E) ploidy, (F) purity, (G) TMB and (H) LOH, across all TCGA tumor samples.

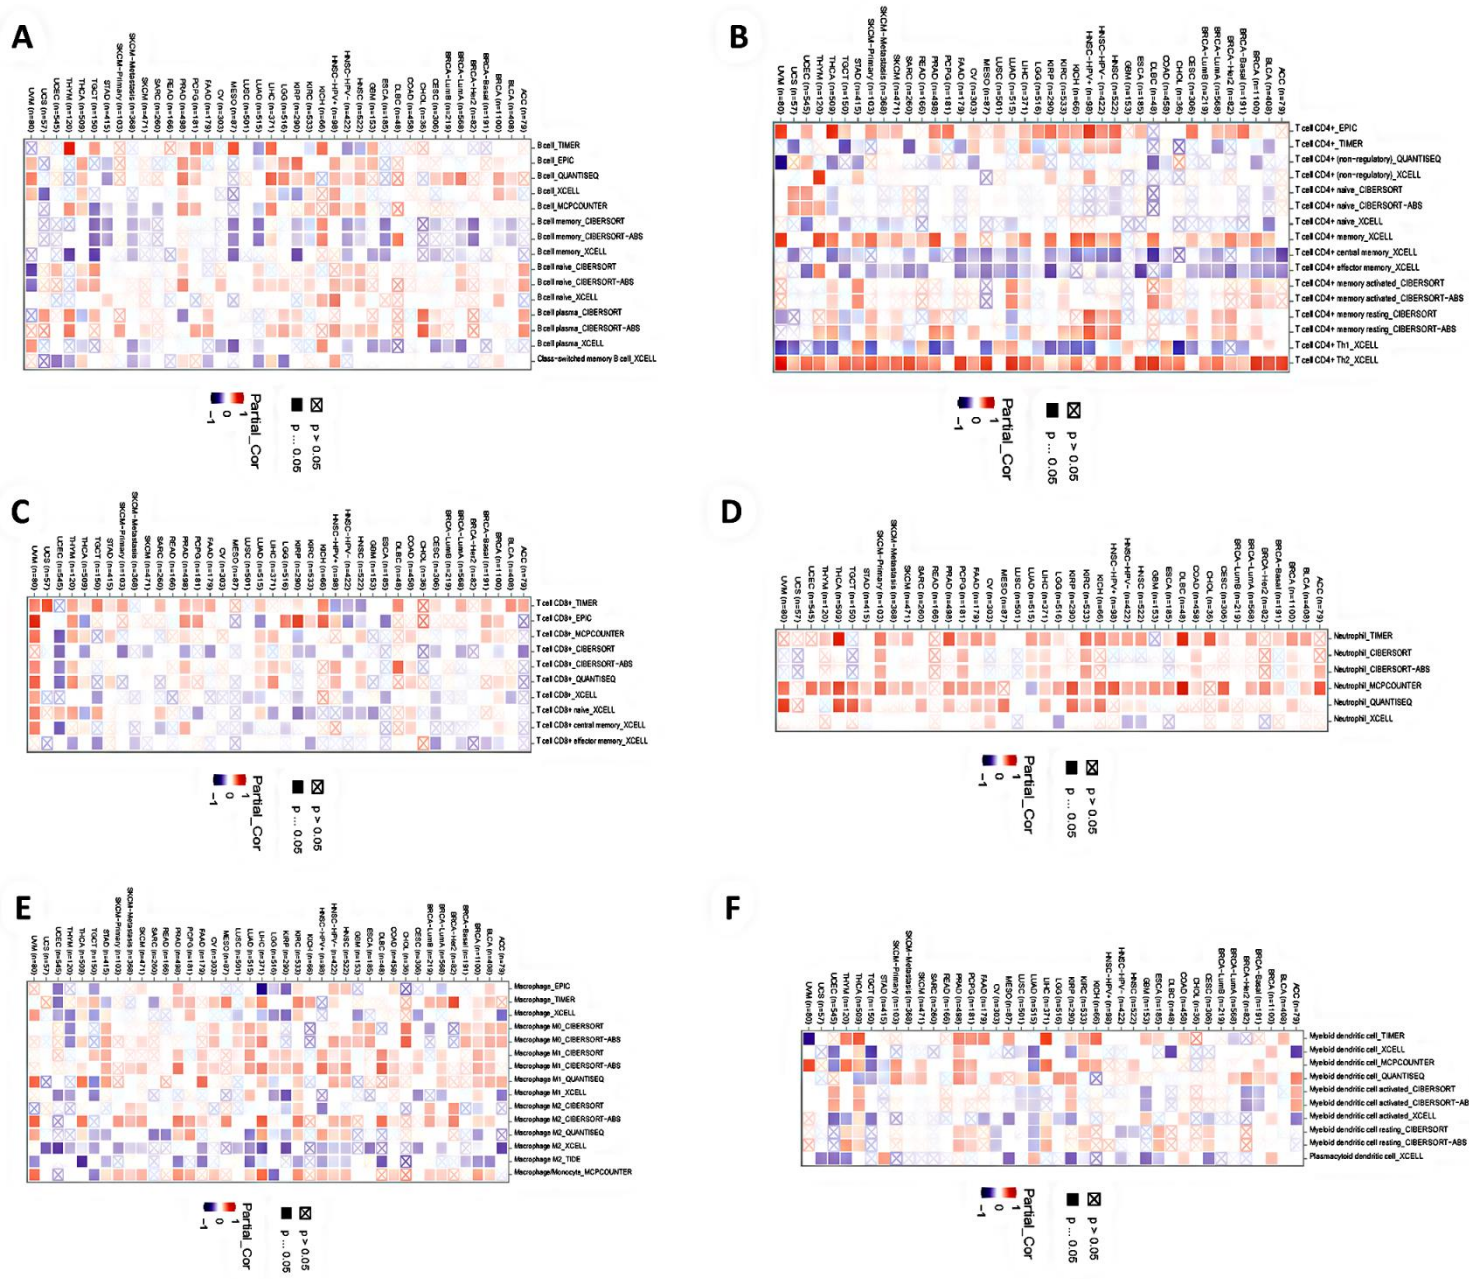

**Figure S6.** Correlation analysis between MCM4 expression and immune infiltration of (A) B cells, (B) CD4+ T cells, (C) CD8+ T cells, (D) neutrophils, (E) macrophages and (F) dendritic cells.

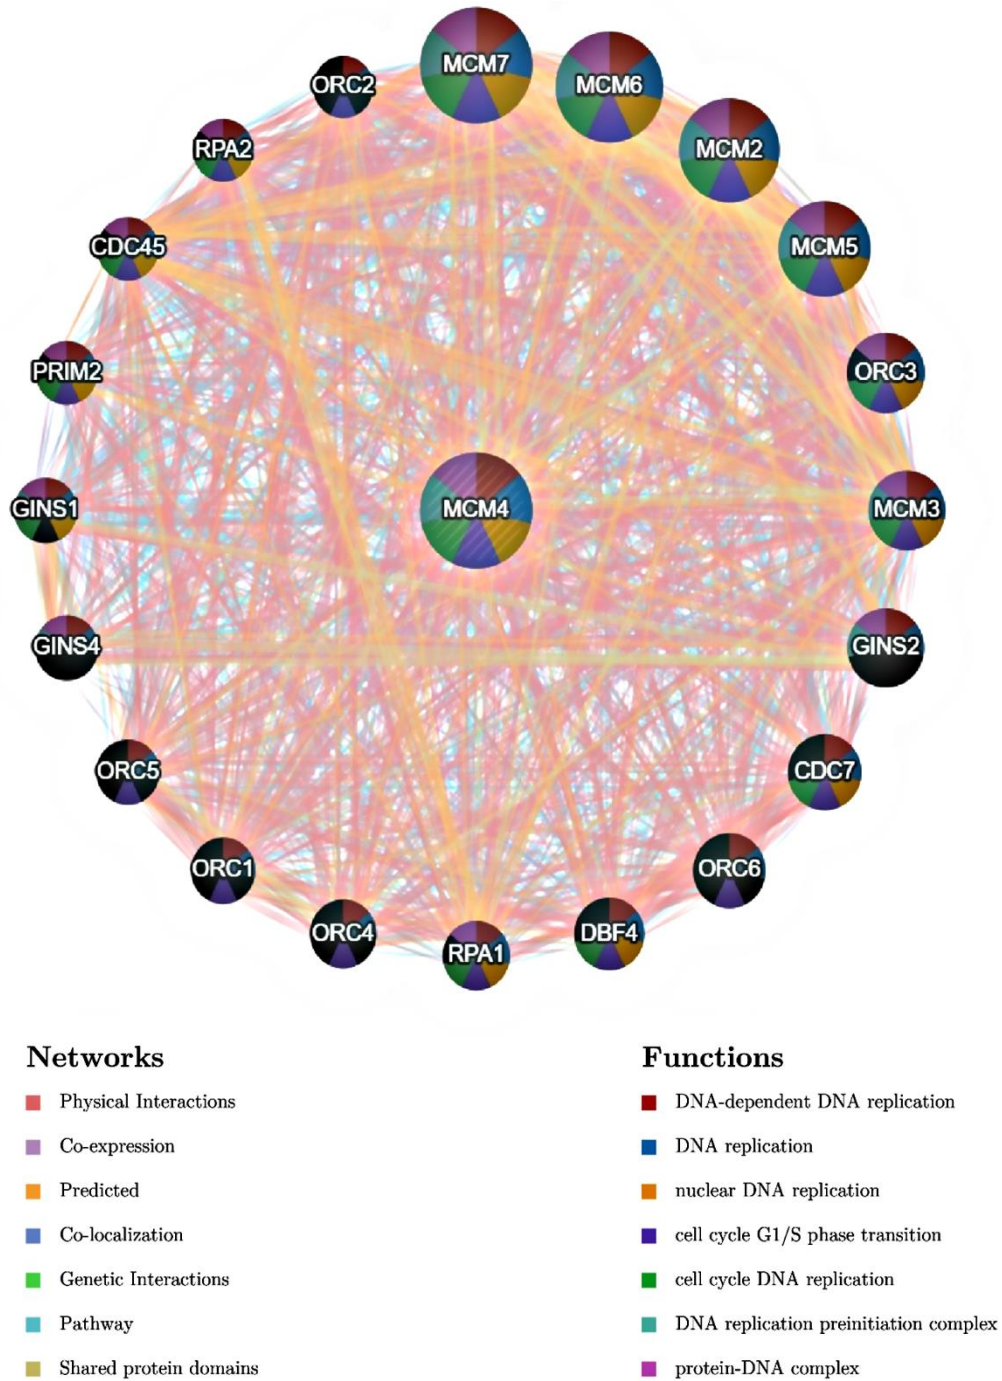

**Figure S7.** GGI network: 20 representative genes strongly associated with MCM4.

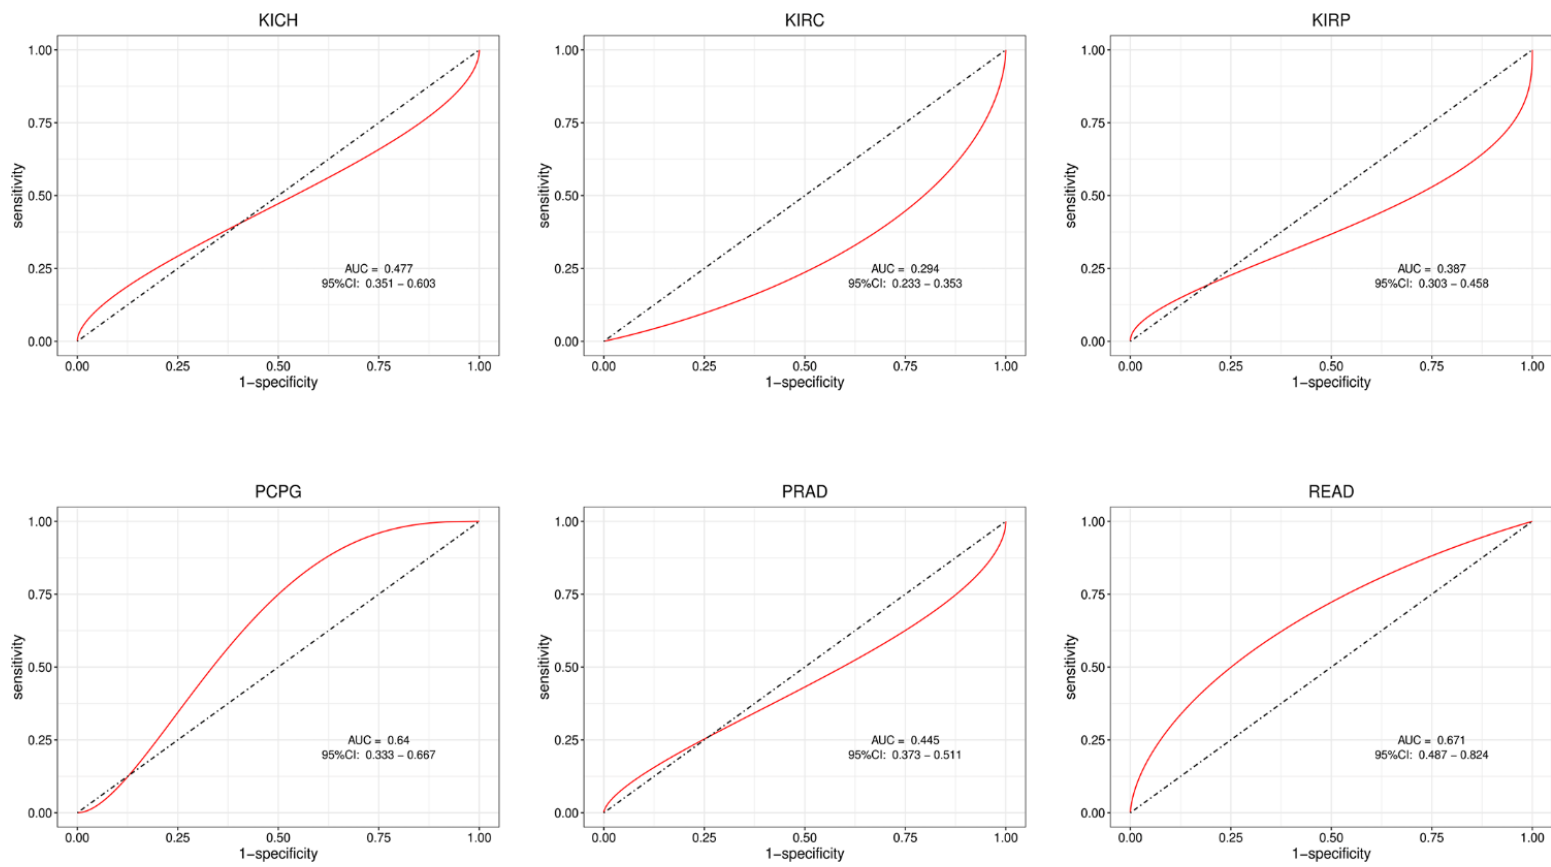

**Figure S8.** The ROC curve for MCM4 in KICH, KIRC, KIRP, PCPG, PRAD and READ.

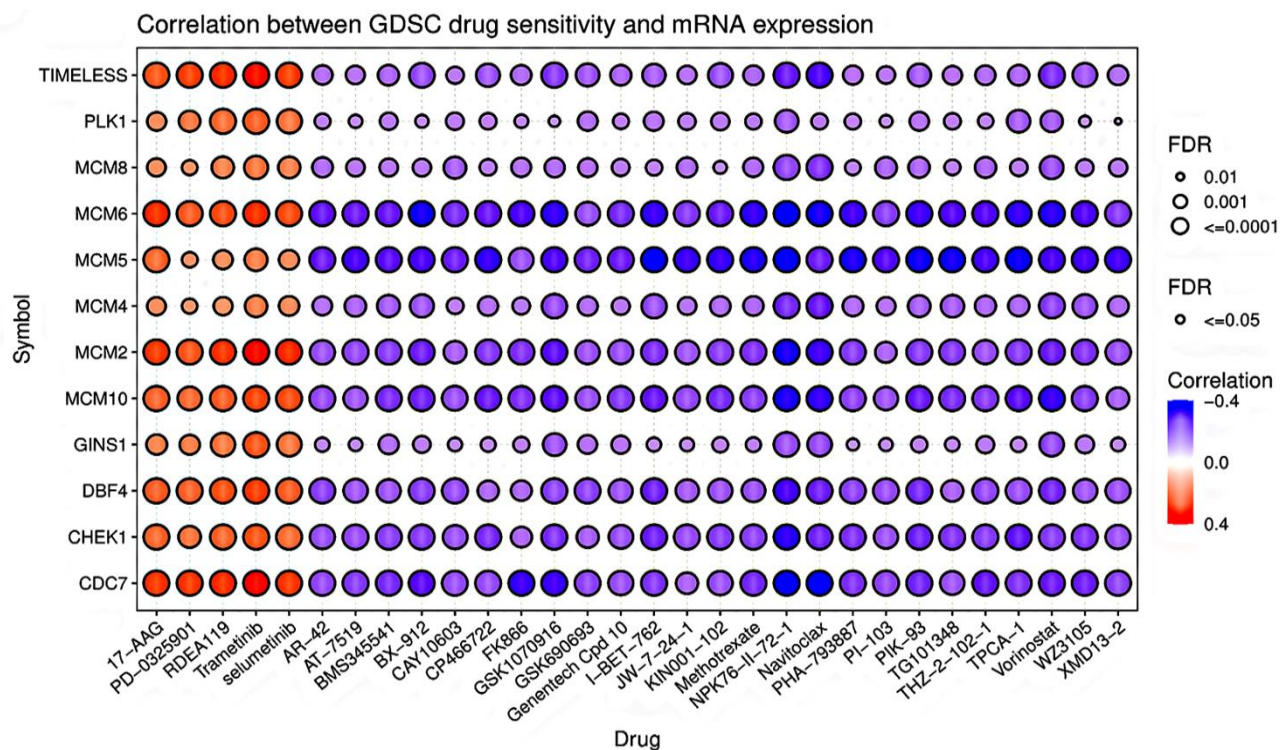

**Figure S9.** The relationship between the expression levels of MCM4 and genes obtained from cross analysis and different drug sensitivities.

## Supplementary Tables

**Table S1.** Top 51 proteins in PPI network, ranked by degree method.

| Proteins' Influence Rank in PPI Network |          |       |
|-----------------------------------------|----------|-------|
| Rank                                    | Name     | Score |
| 1                                       | MCM4     | 50    |
| 2                                       | MCM7     | 44    |
| 2                                       | MCM5     | 44    |
| 4                                       | MCM6     | 43    |
| 5                                       | MCM3     | 42    |
| 5                                       | MCM2     | 42    |
| 7                                       | MCM9     | 39    |
| 8                                       | MCM8     | 38    |
| 9                                       | MCMDC2   | 37    |
| 10                                      | ORC1     | 35    |
| 11                                      | CDC6     | 33    |
| 12                                      | ORC2     | 32    |
| 13                                      | CDC45    | 31    |
| 13                                      | CDC7     | 31    |
| 15                                      | POLA1    | 30    |
| 15                                      | CDK2     | 30    |
| 17                                      | CHEK2    | 29    |
| 17                                      | RPA1     | 29    |
| 17                                      | MCM10    | 29    |
| 20                                      | CDK1     | 28    |
| 21                                      | ORC3     | 27    |
| 22                                      | ORC5     | 26    |
| 23                                      | TIPIN    | 25    |
| 23                                      | HIST1H3A | 25    |
| 25                                      | CENPA    | 24    |
| 26                                      | DBF4     | 22    |
| 26                                      | GINS4    | 22    |
| 26                                      | HIST1H4A | 22    |
| 29                                      | RAD1     | 21    |
| 29                                      | RPA2     | 21    |
| 29                                      | ICK      | 21    |
| 29                                      | ORC4     | 21    |
| 33                                      | MAK      | 20    |
| 33                                      | CCNA1    | 20    |
| 35                                      | MCMBP    | 19    |
| 35                                      | GINS2    | 19    |
| 35                                      | SSRP1    | 19    |
| 35                                      | SUPT16H  | 19    |

---

|    |        |    |
|----|--------|----|
| 39 | PCNA   | 18 |
| 39 | GIN51  | 18 |
| 41 | GIN53  | 17 |
| 41 | CDC5L  | 17 |
| 41 | ASF1B  | 17 |
| 44 | ORC6   | 16 |
| 45 | WDR18  | 13 |
| 46 | KPNA4  | 9  |
| 46 | POLK   | 9  |
| 48 | SF3B1  | 8  |
| 49 | SF3A3  | 4  |
| 49 | DCTN2  | 4  |
| 51 | MAPRE2 | 3  |

---
